# Supplementary material for: Early-phase circulating miRNAs predict tumor recurrence and survival of hepatocellular carcinoma patients after liver transplantation
Source: PubMed Central journal article supplement (PMC4991421; doi:10.18632/oncotarget.7627), 2016-02-23
Supplement: oncotarget-07-19824-s001.pdf [file oncotarget-07-19824-s001.pdf]

SUPPLEMENTARY FIGURE AND TABLES

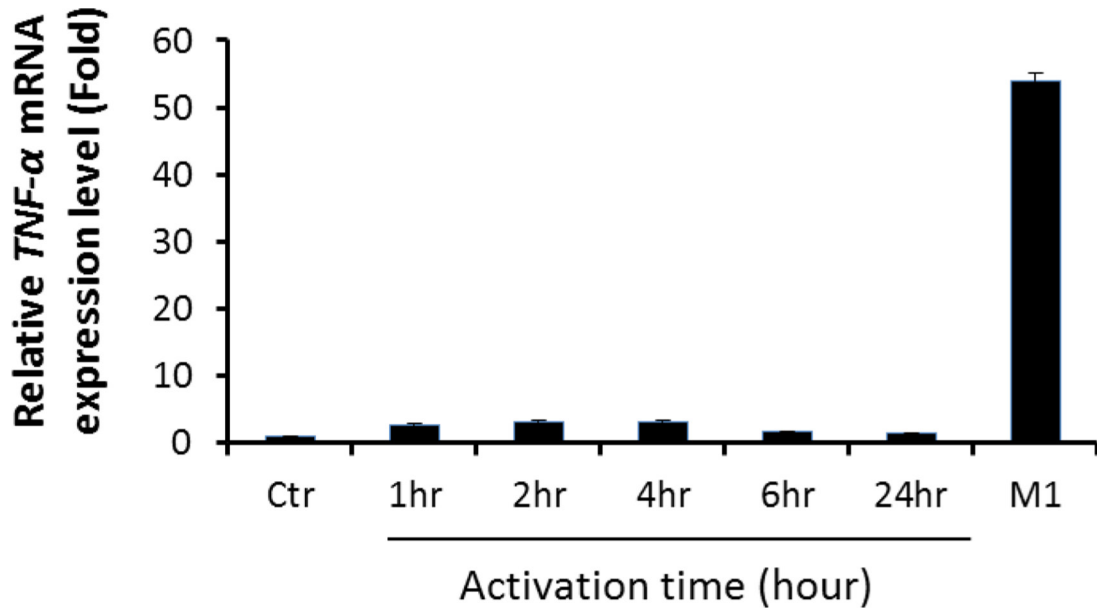

Supplementary Figure S1: The expression level of *TNFα* mRNA in *in vitro* monocyte-to-M1 macrophage model.

**Supplementary Table S1: Summary of area under curve (AUC) of Receiver Operating Characteristic (ROC) analysis and optimal cut-off value for classifying High expression and Low expression group for each acute phase circulating miRNAs**

| <b>miRNAs</b> | <b>AUC of ROC curve</b> | <b>Optimal cut-off value (Log2)</b> |
|---------------|-------------------------|-------------------------------------|
| Let7C         | 0.627                   | 5.23                                |
| miR-21        | 0.646                   | 5.35                                |
| miR-23b       | 0.594                   | 4.64                                |
| miR-27b       | 0.677                   | 7.02                                |
| miR-122       | 0.684                   | 17.86                               |
| miR-125b      | 0.665                   | 12.90                               |
| miR-148a      | 0.761                   | 9.59                                |
| miR-151p-5p   | 0.688                   | 3.18                                |
| miR-192       | 0.675                   | 6.82                                |
| miR-195       | 0.513                   | 3.86                                |
| miR-199a-3p   | 0.595                   | 5.35                                |
| miR-215       | 0.650                   | 9.99                                |
| miR-1246      | 0.769                   | 6.23                                |
| miR-1290      | 0.747                   | 8.43                                |

Supplementary Table S2: Baseline characteristics of HCC recipients before transplantation

|                                                              | All patients<br>(n=62) | Recurrent<br>(n=9) | Non-recurrent<br>(n=53) | <i>P value</i> <sup>c</sup> |
|--------------------------------------------------------------|------------------------|--------------------|-------------------------|-----------------------------|
| Age of recipients (year) <sup>a</sup>                        | 55.0 (30–67)           | 53(41-61)          | 55(30-67)               | 0.608                       |
| Age of donors (year) <sup>a</sup>                            | 37.5(18-72)            | 39(22-63)          | 36(18-72)               | 0.471                       |
| Sex of recipients (male/female)                              | 51 / 11                | 8 / 1              | 43 / 10                 | 1.000                       |
| Sex of donors (male/female)                                  | 26/36                  | 4/5                | 22/31                   | 1.000                       |
| Body weight of recipients (kg) <sup>a</sup>                  | 67(44-94)              | 65(46-91)          | 68(44-94)               | 1.000                       |
| Milan criteria (within/beyond)                               | 38 / 24                | 2 / 7              | 36 / 17                 | 0.021*                      |
| UCSF criteria (within / beyond)                              | 45 / 17                | 3 / 6              | 42 / 11                 | 0.010*                      |
| Serum $\alpha$ -fetoprotein (ng/ml) <sup>a</sup>             | 15(1-11210)            | 25(2-1793)         | 14(1-11210)             | 1.000                       |
| Graft weight to Recipient ESLV (%) <sup>a</sup>              | 49(27-110)             | 48(38-123)         | 50 (27-110)             | 0.471                       |
| Vascular permeation (Yes / No) <sup>b</sup>                  | 19/41                  | 5/3                | 14 / 38                 | 0.095                       |
| Type of liver transplantation (LDLT / DDLT)                  | 52 / 10                | 8 / 1              | 44 / 9                  | 1.000                       |
| Number of tumor <sup>a</sup>                                 | 2 (1-9)                | 4(1-9)             | 1(1-9)                  | 0.003**                     |
| Size of the largest tumor(cm)                                | 3(1-8)                 | 4(2-5)             | 3(1-8)                  | 0.784                       |
| Hepatitis B surface antigen (positive/negative) <sup>b</sup> | 40/8                   | 6/0                | 34/8                    | 0.571                       |
| pTNM stage (Early/Advanced) <sup>b</sup>                     | 23/38                  | 0/8                | 23/30                   | 0.020*                      |
| Transarterial chemoembolization while on list (yes/no)       | 23/39                  | 5/4                | 18/35                   | 0.272                       |
| Overall survival (Month) <sup>a</sup>                        | 91(6-138)              | 22(10-91)          | 96 (6-138)              | 0.000**                     |
| Disease-free survival (Month) <sup>a</sup>                   | 91(3-138)              | 11(3-45)           | 96(6-138)               | 0.000**                     |

<sup>a</sup> Median (range). <sup>b</sup>Total number less than 62 due to missing data. <sup>c</sup>Chi-square test or Fisher's exact test were performed for categorical variables while Mann-Whitney U test was performed for continuous variables. \*,  $p < 0.05$ ; \*\*,  $p < 0.01$ .
